# Supplementary material for: The Cretaceous physiological adaptation of angiosperms to a declining p CO 2 : a modeling approach emulating paleo-traits
Source: Copernicus journal article supplement (doi:10.5194/bg-18-5729-2021), 2021-10-25
Supplement: Supplementary file [file bg-18-5729-2021-supplement-title-page.pdf › bg-18-5729-2021-supplement-title-page.pdf]

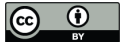

## *Supplement of*

# **The Cretaceous physiological adaptation of angiosperms to a declining $p\text{CO}_2$ : a modeling approach emulating paleo-traits**

**Julia Bres et al.**

*Correspondence to:* Julia Bres ([julia.bres@lsce.ipsl.fr](mailto:julia.bres@lsce.ipsl.fr))

- [bg-18-5729-2021-supplement-title-page.pdf](#)
- [Supplement\\_of\\_The\\_Cretaceous\\_physiological\\_adaptation\\_of\\_angiosperms\\_to\\_a\\_declining\\_pCO2\\_\\_a\\_modeling\\_approach\\_emulating\\_paleo\\_traits.pdf](#)
- [TableS2.ods](#)

The copyright of individual parts of the supplement might differ from the article licence.
